# Supplementary material for: Investigating the Impact of Storage Conditions on Microbial Community Composition in Soil Samples
Source: PLoS One. 2013 Jul 31;8(7):e70460. doi: 10.1371/journal.pone.0070460 (PMC3729949; doi:10.1371/journal.pone.0070460)
Supplement: Table S3 — (XLS) [file pone.0070460.s008.xls]

## Sheet: Sheet1
Table S3. Ranges of alpha diversities for samples from all EMP studies examined here.
		Equitability				Richness				Shannon
EMP study	Samples	Mean	Min	Max	Range	Mean	Min	Max	Range	Mean	Min	Max	Range
Current	36	0.9	0.88	0.91	0.03	1119	1031	1184	153	9.1	8.8	9.2	0.4
632	11	0.812	0.71	0.866	0.156	978	654	1233	579	8.05	6.81	8.86	2.05
659	23	0.72	0.655	0.768	0.113	903	771	991	220	7.07	6.28	7.57	1.29
722	187	0.665	0.425	0.852	0.427	514	118	1465	1347	5.84	3	8.95	5.95
808	13	0.8	0.748	0.836	0.088	732	495	923	428	7.59	6.78	8.22	1.44
1031	11	0.826	0.796	0.843	0.047	908	699	1080	381	8.11	7.69	8.49	0.8
1034	26	0.773	0.451	0.864	0.413	678	181	1099	918	7.21	3.38	8.66	5.28
1035	113	0.678	0.471	0.79	0.319	391	182	723	541	5.81	3.53	7.45	3.92
1036	66	0.745	0.638	0.834	0.196	613	450	900	450	6.89	5.67	8.19	2.52
1037	24	0.809	0.723	0.86	0.137	986	640	1269	629	8.03	6.74	8.86	2.12
1038	21	0.813	0.768	0.868	0.1	968	638	1233	595	8.05	7.17	8.92	1.75
1289	63	0.85	0.83	0.873	0.043	1101	986	1248	262	8.6	8.3	8.99	0.69
1526	94	0.805	0.654	0.869	0.215	781	503	1178	675	7.72	6.15	8.76	2.61
Diversities were calculated at a depth of 6,700 reads.
